# Supplementary material for: Advantages and limitations of intraoperative ultrasound strain elastography applied in brain tumor surgery: a single-center experience
Source: Research Square preprint supplement (doi:10.21203/rs.3.rs-654010/v1), 2021-06-25

**Advantages and limitations of intraoperative ultrasound strain elastography applied in brain tumor surgery: a single-center experience**

*Santiago Cepeda1, Sergio García-García1, Ignacio Arrese1, María Velasco-Casares2, Rosario Sarabia1*

1. Department of Neurosurgery, University Hospital Río Hortega, Valladolid, Spain

2. Department of Radiology, University Hospital Río Hortega, Valladolid, Spain

Corresponding author: Santiago Cepeda, M.D., Ph.D., Department of Neurosurgery, University Hospital Río Hortega, Calle Dulzaina, 2, Valladolid 47012, Spain. Telephone: +34 651 03 51 58. Email: cepeda_santiago@hotmail.com. ORCID ID: https://orcid.org/0000-0003-1667-8548

**Journal Name :** Acta Neurochirurgica


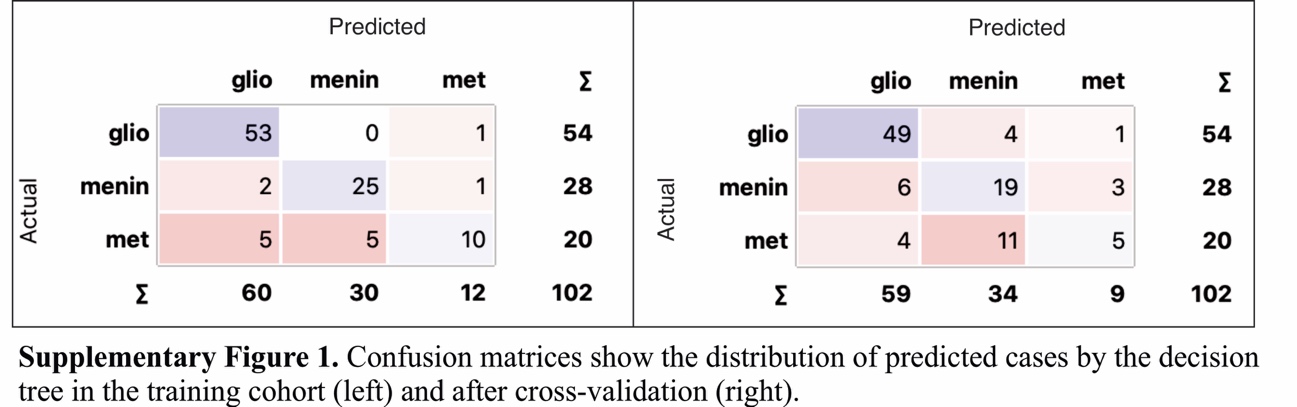


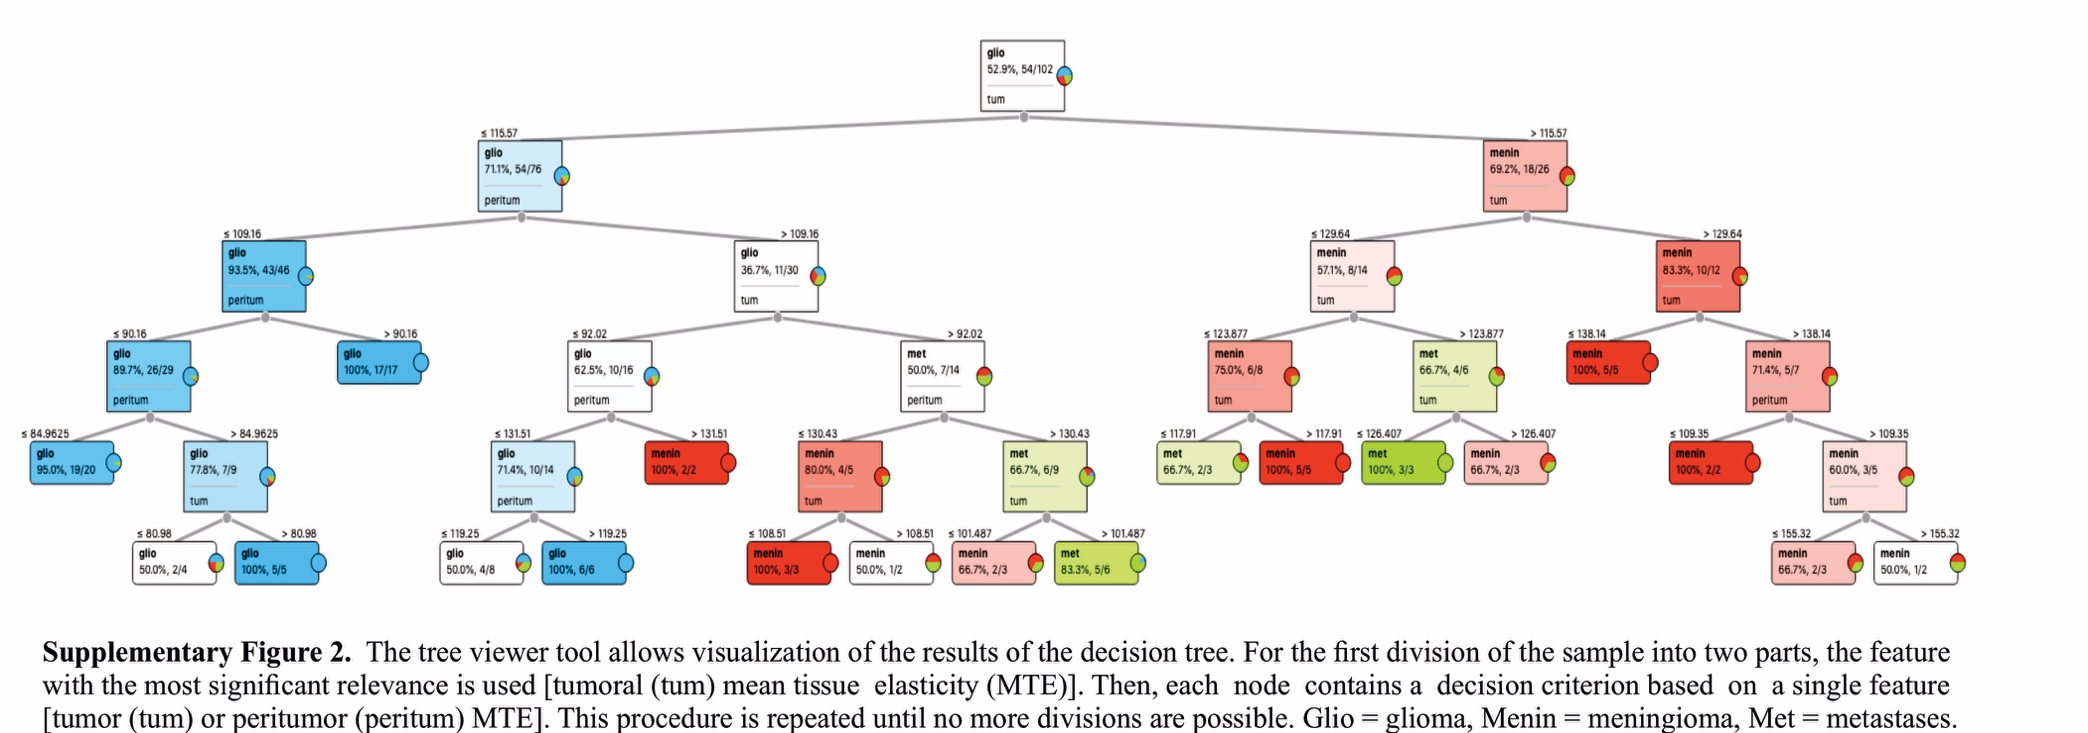

Supplement: Supplementary file 1 [file 0af3f0bdd9d2613fe41210ad.docx]
